# Supplementary material for: Adaptive two-stage inverse sampling design to estimate density, abundance, and occupancy of rare and clustered populations
Source: PubMed Central journal article supplement (PMC8372892; doi:10.1371/journal.pone.0255256), 2021-08-18
Supplement: pone.0255256.s004.pdf [file pone.0255256.s004.pdf]

**S1 Appendix: Derivation of  $\hat{\tau}_i$ .**

If  $\nu_i > k_i$ , i.e. the one at a time sampling part is carried out in PSU  $i$ . To evaluate  $P(j|s_i)$  in (1), let  $D_{ij}$  be the number of ways that the selected sample  $s_i$  can be constructed such that unit  $j$  in PSU  $i$  is the first selected unit, and let  $D_i$  be the number of ways that the selected sample  $s_i$  can be constructed. Thus,  $P(j|s_i) = D_{ij}/D_i$ . If unit  $j$  belongs to  $\mathcal{S}_{iC'}$ , one of the  $k_i - 1$  remaining units in  $s_i$  should be allocated as the last selected unit so that  $D_{ij} = (k_i - 1)(\nu_i - 2)!$  and  $D_i = k_i(\nu_i - 1)!$ . We therefore have  $P(j|s_i) = D_{ij}/D_i = (k_i - 1)/(k_i(\nu_i - 1))$  for  $j \in \mathcal{S}_{iC'}$ . If unit  $j$  belongs to  $\mathcal{S}_{iC}$ , one of the  $k_i$  units in  $s_i$  should be allocated as the last selected unit so that  $D_{ij} = k_i(\nu_i - 2)!$  and the same as before  $D_i = k_i(\nu_i - 1)!$ . We therefore have  $P(j|s_i) = D_{ij}/D_i = 1/(\nu_i - 1)$  for  $j \in \mathcal{S}_{iC}$ . We also have  $p_{i,j} = 1/N_i$  for all  $j$  and  $i$ . Substituting the probabilities into (1), we have

$$\begin{aligned} \hat{\tau}_i &= \sum_{j \in s_i} \frac{P(j|s_i)}{p_{j,i}} y_{ij} = N_i \sum_{j \in s_i} P(j|s_i) y_{ij} \\ &= N_i \left( \frac{1}{k_i} \sum_{j \in \mathcal{S}_{iC'}} \frac{k_i - 1}{\nu_i - 1} y_{ij} + \frac{1}{\nu_i - k_i} \sum_{j \in \mathcal{S}_{iC}} \frac{\nu_i - k_i}{\nu_i - 1} y_{ij} \right) \\ &= N_i \left( \hat{P}_i \bar{y}_{iC'} + (1 - \hat{P}_i) \bar{y}_{iC} \right) \end{aligned}$$

If  $k_i = \nu_i$ , i.e. the one at a time part of sampling is not carried out in PSU  $i$ , so that  $\hat{P}_i$  will be 1 and  $\hat{\tau}_i = N_i \bar{y}_{iC'}$  which is given by (3).
