# Supplementary material for: Adaptive two-stage inverse sampling design to estimate density, abundance, and occupancy of rare and clustered populations
Source: PubMed Central journal article supplement (PMC8372892; doi:10.1371/journal.pone.0255256), 2021-08-18
Supplement: pone.0255256.s005.pdf [file pone.0255256.s005.pdf]

**S2 Appendix: Proof of  $\widehat{\text{var}}(\hat{\tau}) = \widehat{\text{var}}(\tilde{\tau})$  when  $c = 0$ .**

Since  $y_{ij} = 0$  for all non-rare units  $\bar{y}_{\nu_i-1} = (\nu_i - k_i)/(\nu_i - 1)\bar{y}_{iC}$ . Using simple algebra, we can show that

$$\sum_{j=1}^{\nu_i-1} (y_{ij} - \bar{y}_{\nu_i-1})^2 = \sum_{j \in S_{iC}} (y_{ij} - \frac{\nu_i - k_i}{\nu_i - 1} \bar{y}_{iC})^2 + (k_i - 1) \left( \frac{\nu_i - k_i}{\nu_i - 1} \right)^2 \bar{y}_{iC}^2$$

Adding and subtracting  $\bar{y}_{iC}$  inside of the bracket of the first term on the right-hand side, we will have,

$$\begin{aligned} \sum_{j=1}^{\nu_i-1} (y_{ij} - \bar{y}_{\nu_i-1})^2 &= \sum_{j \in S_{iC}} (y_{ij} - \bar{y}_{iC})^2 + (\nu_i - k_i) \left( \frac{k_i - 1}{\nu_i - 1} \right)^2 \bar{y}_{iC}^2 + (k_i - 1) \left( \frac{\nu_i - k_i}{\nu_i - 1} \right)^2 \bar{y}_{iC}^2 \\ &= \sum_{j \in S_{iC}} (y_{ij} - \bar{y}_{iC})^2 + \frac{(k_i - 1)(\nu_i - k_i)}{\nu_i - 1} \bar{y}_{iC}^2 \end{aligned}$$

Multiplying both sides by  $N_i^2(1 - (\nu_i - 1)/((\nu_i - 1)(\nu_i - 2)))$ , the left-hand side will be  $\widehat{\text{var}}(\tilde{\tau})$  and we have,

$$\begin{aligned} \widehat{\text{var}}(\tilde{\tau}) &= \frac{N_i(N_i - \nu_i + 1)}{(\nu_i - 1)(\nu_i - 2)} \sum_{j \in S_{iC}} (y_{ij} - \bar{y}_{iC})^2 + \frac{N_i(N_i - \nu_i + 1)(k_i - 1)(\nu_i - k_i)}{(\nu_i - 1)^2(\nu_i - 2)} \bar{y}_{iC}^2 \\ &= B s_{iC}^2 + \widehat{\text{var}}(\hat{P}) y_{iC}^2 \end{aligned}$$

where  $B$  is defined in (4). Since  $y_{iC'}^2 = 0$  and  $s_{iC'}^2 = 0$ , the right-hand side is  $\widehat{\text{var}}(\hat{\tau})$ .
